# Supplementary material for: Measurement of C-reactive protein, procalcitonin and neutrophil elastase in saliva of COPD patients and healthy controls: correlation to self-reported wellbeing parameters
Source: Springer Nature journal article supplement (doi:10.1186/s12931-015-0219-1), 2015-05-28
Supplement: MOESM2 [file 9759678]

## Wellbeing Diary & Life Impact Scores.

### Breathing Score

*How was your breathing today?*

Excellent = 1; Good = 2; Fair = 3; Bad = 4; Very Bad = 5

### Activity of Daily Living Score

*Has your breathing affected your ability to perform daily activities such as self-wash/dress, cooking, housework?*

Not at all = 1; A little = 2; A fair amount = 3; Much = 4; Very much = 5.

### Sputum Amount

*How much sputum have you produced?*

None = 1; Up to 5mls (1 teaspoon) = 2; Up to 15mls (1 tablespoon) = 3; Up to 30mls = 4 (1 egg cup); Up to or greater than 50mls (1 cup) = 5.

### Sputum Texture

*How would you describe the produced sputum?*

Watery = 1; Sticky Liquid = 2; Semi -solid = 3; Solid = 4.

### Sputum Colour (Participants were provided with a colour chart)

*What is the colour of your sputum?*

Watery, clear, transparent = 1; Watery, cloudy, colourless = 2; Creamy = 3;

Light Green = 4; Dark Green = 5.
