# Supplementary material for: Measurement of C-reactive protein, procalcitonin and neutrophil elastase in saliva of COPD patients and healthy controls: correlation to self-reported wellbeing parameters
Source: Springer Nature journal article supplement (doi:10.1186/s12931-015-0219-1), 2015-05-28
Supplement: MOESM3 [file 9759678]

## Sheet: Sheet1
Salivary Biomarkers	Breathing Score	ADL Score	MRC Score
CRP	r = 0.142,	r = 0.105,	r = 0.164,
	p < 0.02	p < 0.08	p < 0.006
PCT	r = 0.125,	r = 0.115,	r = 0.04,
	p < 0.04	p < 0.06	p < 0.444
NE	r = 0.105,	r = 0.028,	r = -0.074,
	p < 0.082	p < 0.647	p < 0.222
