# Supplementary material for: Measurement of C-reactive protein, procalcitonin and neutrophil elastase in saliva of COPD patients and healthy controls: correlation to self-reported wellbeing parameters
Source: Springer Nature journal article supplement (doi:10.1186/s12931-015-0219-1), 2015-05-28
Supplement: MOESM4 [file 9759678]

## Sheet: Sheet1
Salivary Biomarkers	Sputum Amount	Sputum Texture	Sputum Colour
CRP	r = 0.148,	r = 0.130,	r = 0.324,
	p < 0.013	p < 0.032	p <0.001
PCT	r = 0.130,	r = 0.107,	r = 0.229,
	p < 0.033	p < 0.078	p<0.001
NE	r = 0.075,	r = -0.118,	r = 0.068,
	p < 0.219	p < 0.051	p<0.266
